# Supplementary material for: On parameter bias in earthquake sequence models using data assimilation
Source: Copernicus journal article supplement (doi:10.5194/npg-30-101-2023), 2023-04-05
Supplement: Supplementary file 1 [file npg-30-101-2023-supplement.pdf]

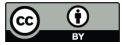

*Supplement of*

## **On parameter bias in earthquake sequence models using data assimilation**

**Arundhuti Banerjee et al.**

*Correspondence to:* Femke C. Vossepoel ([f.c.vossepoel@tudelft.nl](mailto:f.c.vossepoel@tudelft.nl))

The copyright of individual parts of the supplement might differ from the article licence.

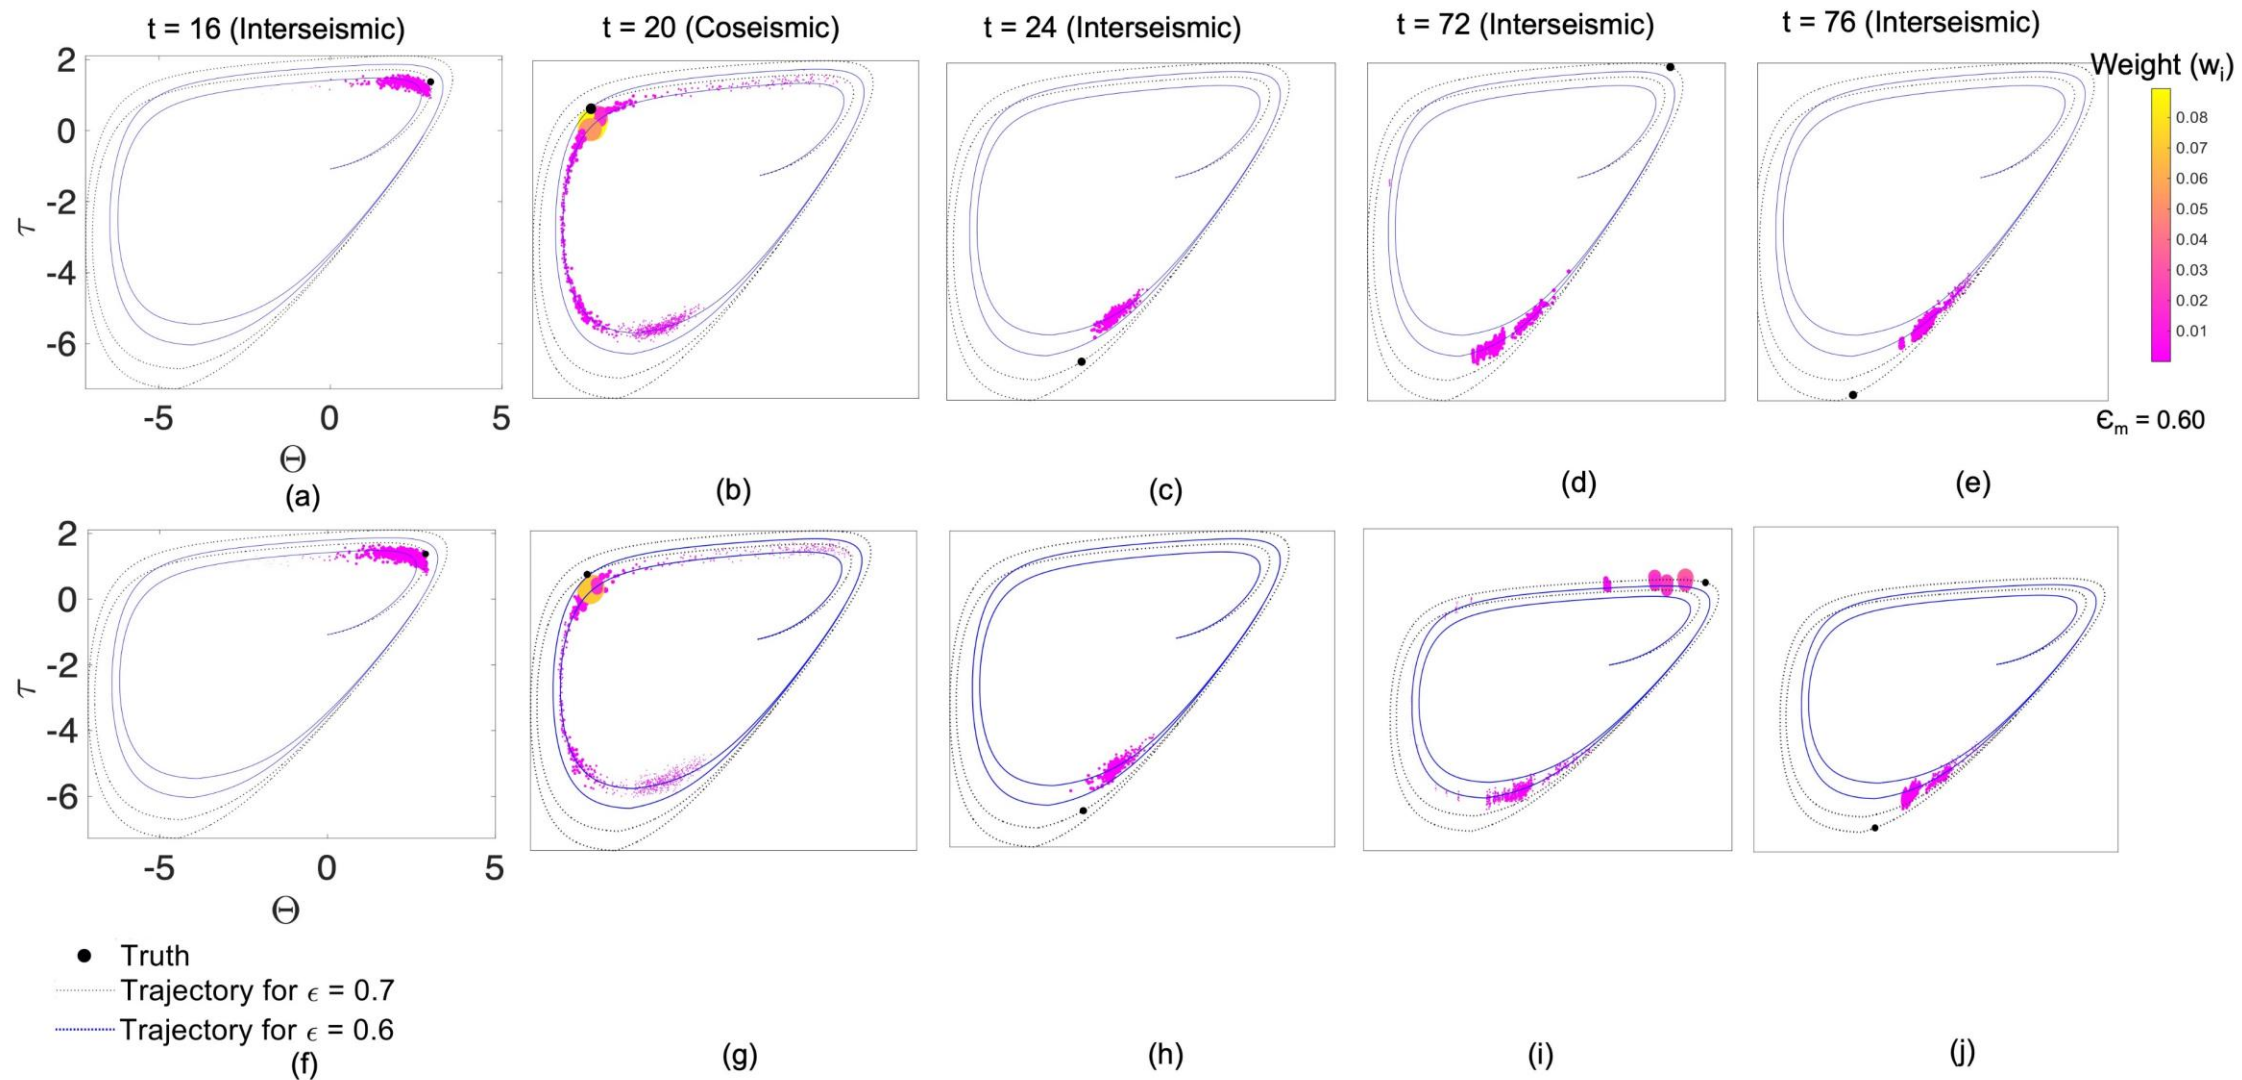

Figure S1: Particles in the  $\Theta$ - $\tau$  space for the case of state estimation with intermediate bias, (a-e): with a model error of 0.01 standard deviation and (f-j) model error of 0.1 standard deviation.

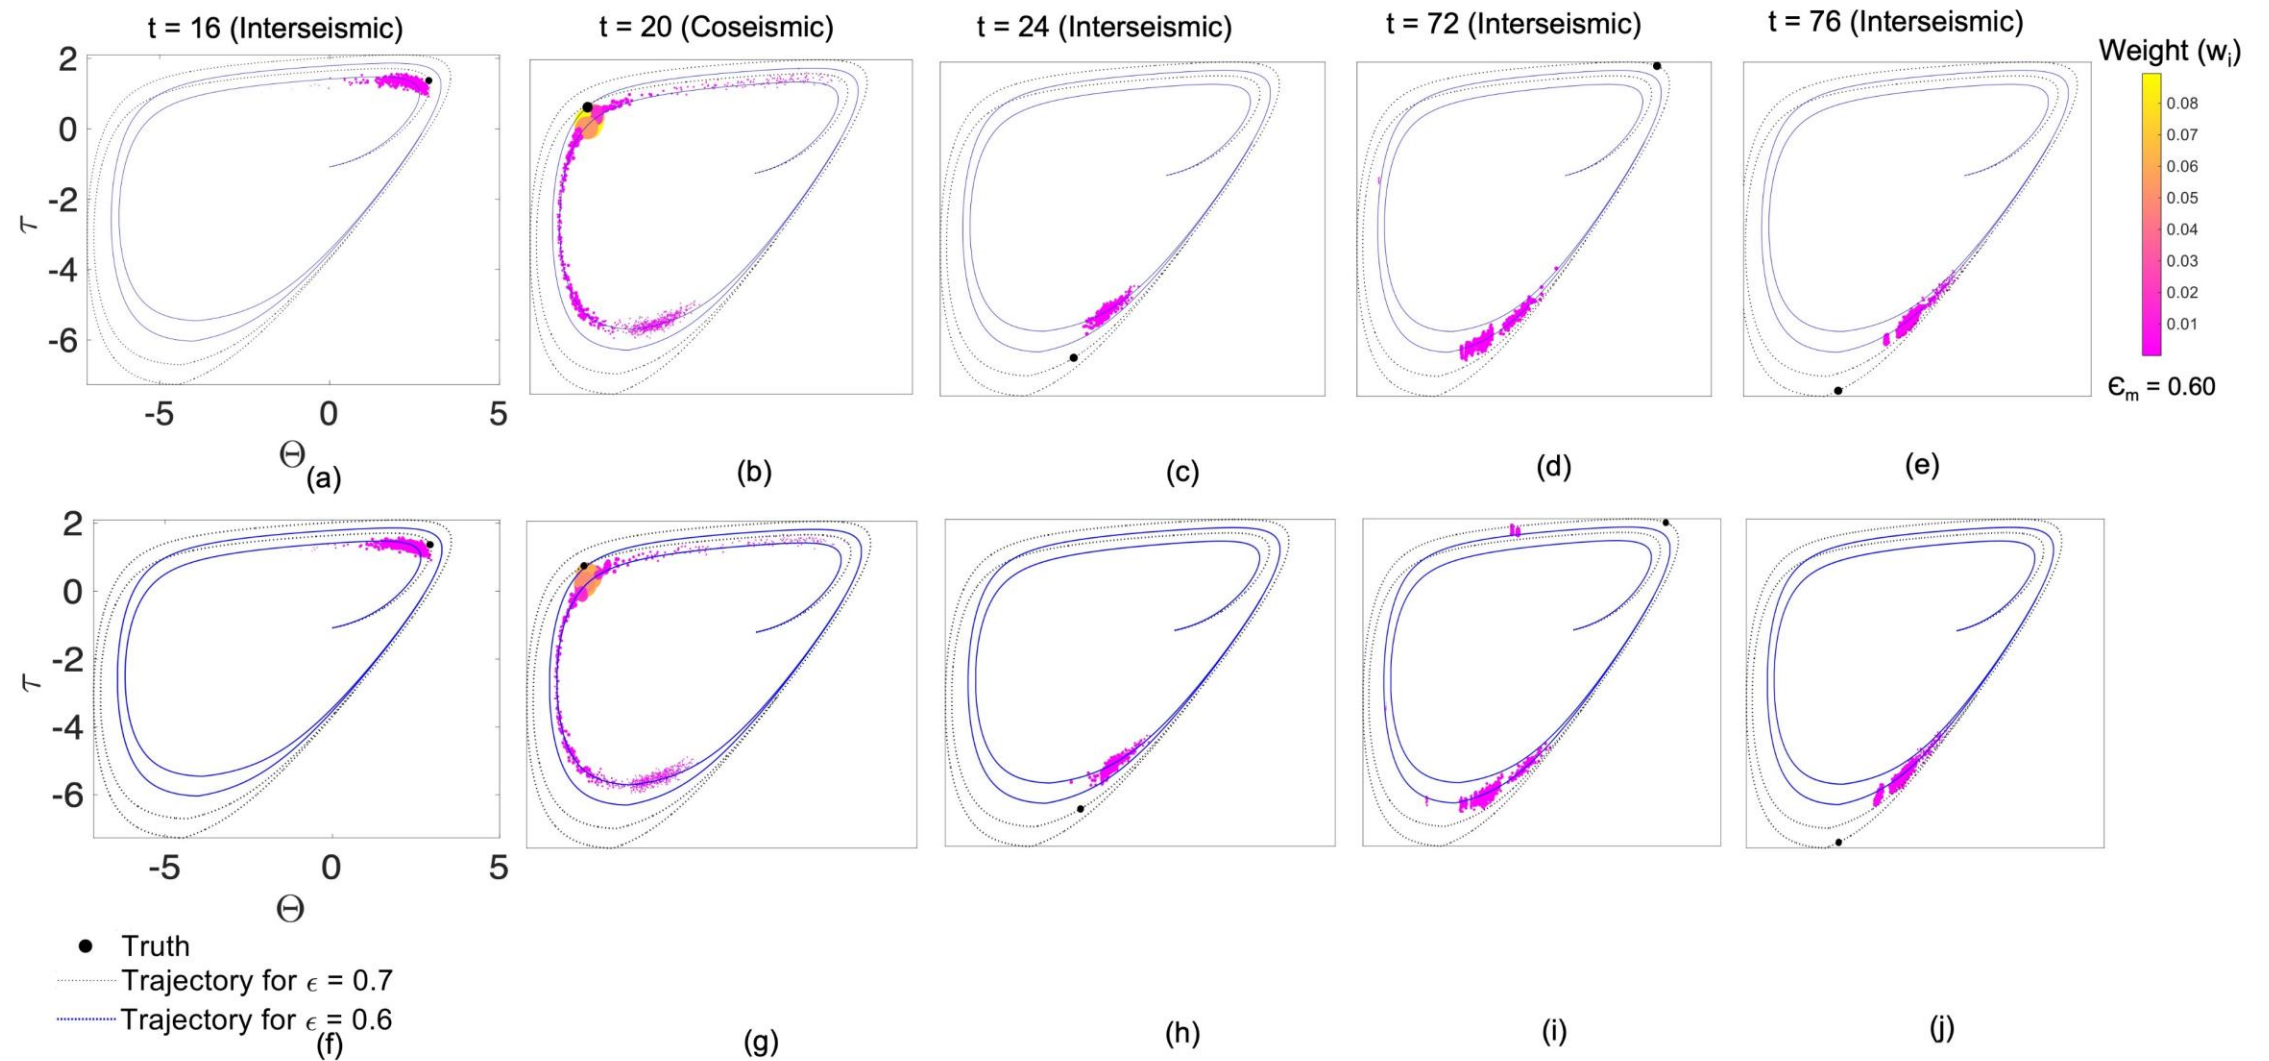

Figure S2: Particles in the  $\Theta$ - $\tau$  space for the case of state estimation with intermediate bias (a-e): without double resampling (model error 0.01 SD) and (f-j) with double resampling (model error 0.01 SD).

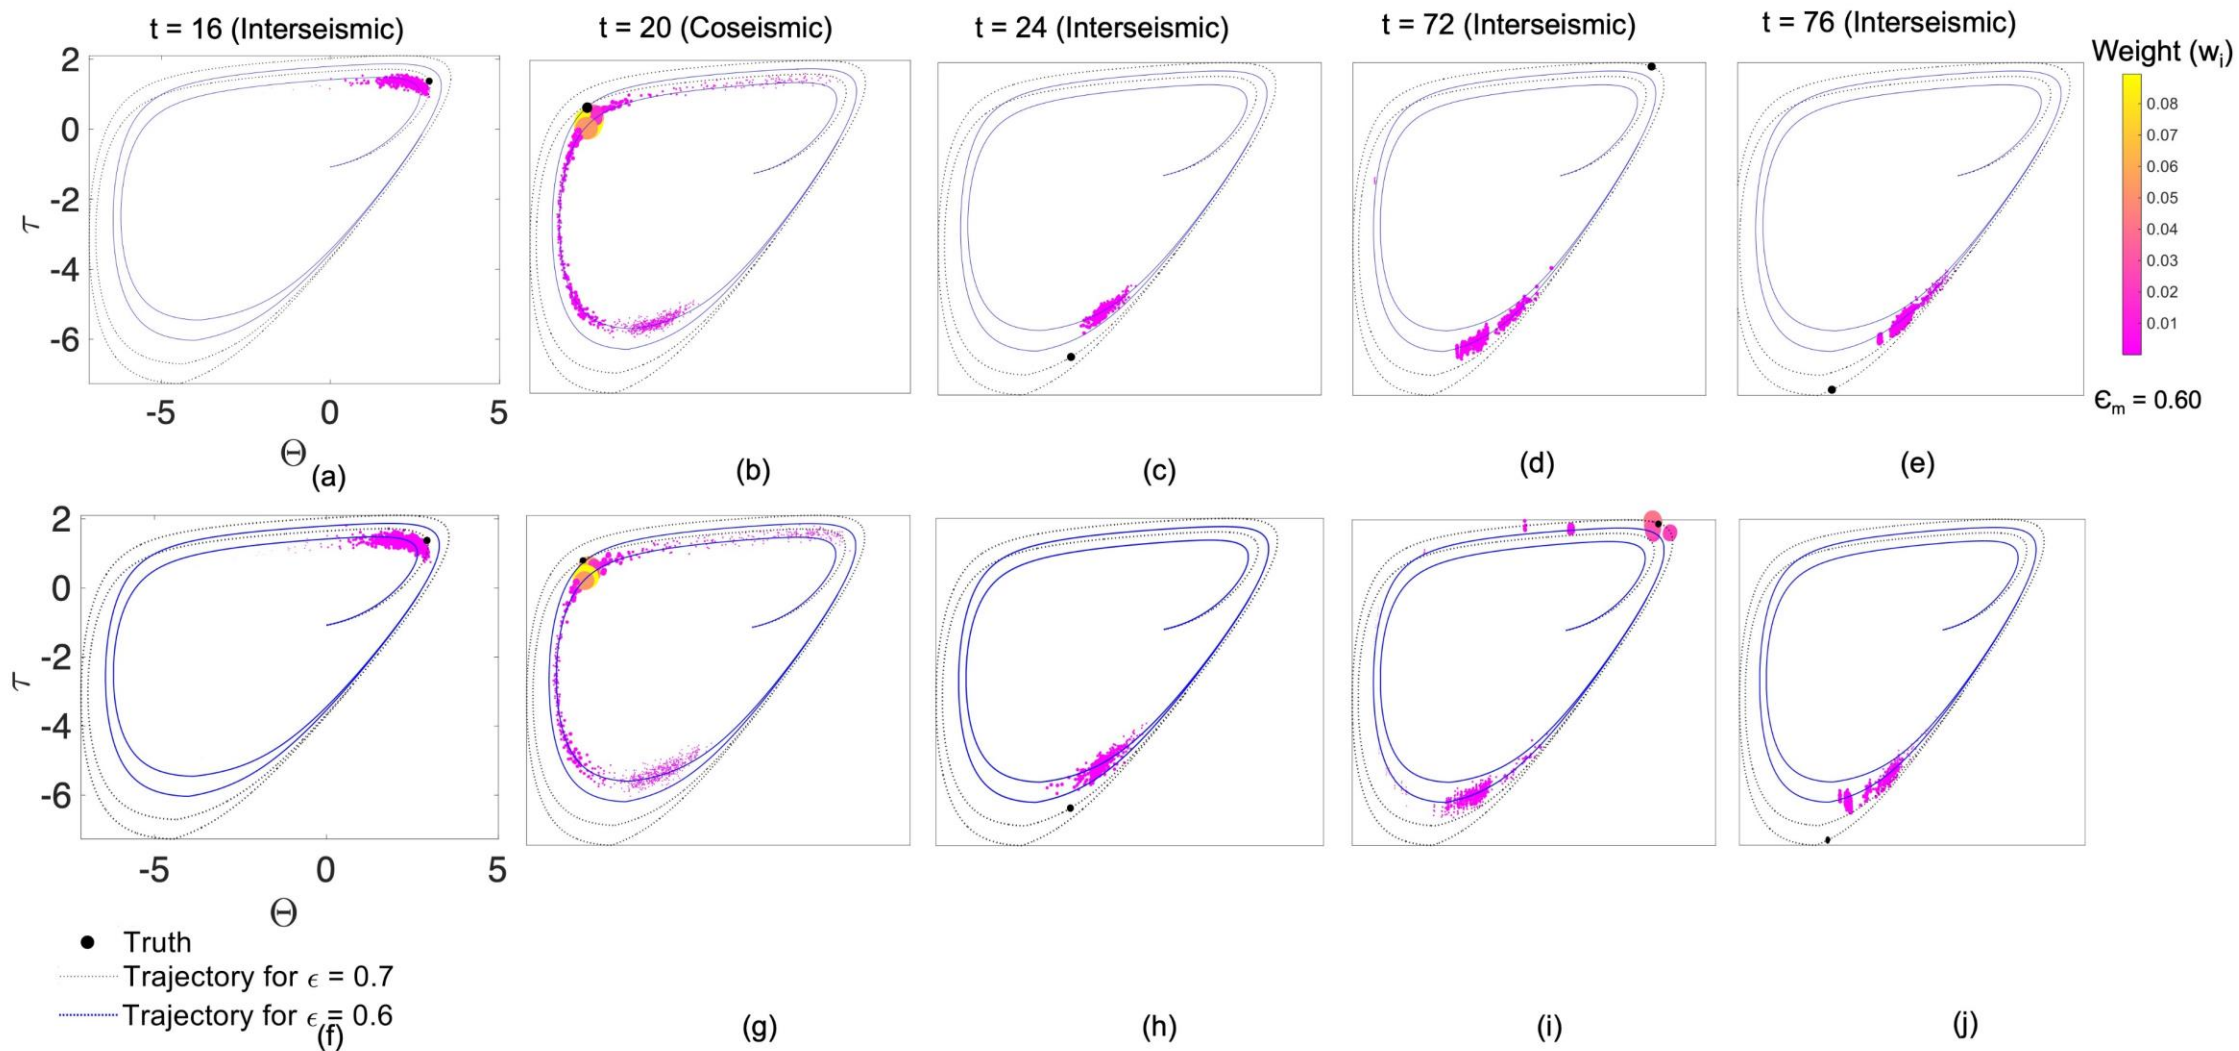

Figure S3: Particles in the  $\Theta$ - $\tau$  space for the case of state estimation with intermediate bias (a-e): with a model error of 0.01 standard deviation and no double resampling and (f-j) model error of 0.1 standard deviation and double resampling (combined).
